# Supplementary material for: Insights on Microbial Communities Inhabiting Non-Volcanic Hot Springs
Source: MDPI journal article supplement (doi:10.3390/ijms232012241), 2022-10-13
Supplement: s1 [file s1]

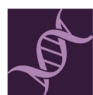

Article

# Insights on Microbial Communities Inhabiting Non-Volcanic Hot Springs

Juan-José Escuder-Rodríguez, María-Eugenia DeCastro, Almudena Saavedra-Bouza, Manuel Becerra \* and María-Isabel González-Siso \*

Grupo EXPRELA, Centro de Investigaciones Científicas Avanzadas (CICA), Departamento de Biología, Facultad de Ciencias, Universidade da Coruña, 15071 A Coruña, Spain

\* Correspondence: manuel.becerra@udc.es (M.B.); isabel.gsiso@udc.es (M.-I.G.-S.)

**Supplementary Materials:** The following supporting information can be downloaded at: [www.mdpi.com/xxx/s1](http://www.mdpi.com/xxx/s1), Figure S1: Schematic representation of Muiño da Veiga hot springs and sampling site. Figure S2: Rarefaction plot. Figure S3: CheckM plot. Table S1: Statistics for the meta-genome from Muiño da Veiga hot spring. Table S2. CheckM report.

**Citation:** Escuder-Rodríguez, J.-J.; DeCastro, M.-E.; Saavedra-Bouza, A.; Becerra, M.; González-Siso, M.-I. Insights on Microbial Communities Inhabiting Non-Volcanic Hot Springs. *Int. J. Mol. Sci.* **2022**, *23*, 12241. <https://doi.org/10.3390/ijms232012241>

Academic Editors: Salvatore Fusco and Bettina Siebers

Received: 4 July 2022

Accepted: 4 October 2022

Published: 13 October 2022

**Publisher's Note:** MDPI stays neutral with regard to jurisdictional claims in published maps and institutional affiliations.

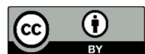

**Copyright:** © 2022 by the authors. Submitted for possible open access publication under the terms and conditions of the Creative Commons Attribution (CC BY) license (<https://creativecommons.org/licenses/by/4.0/>).

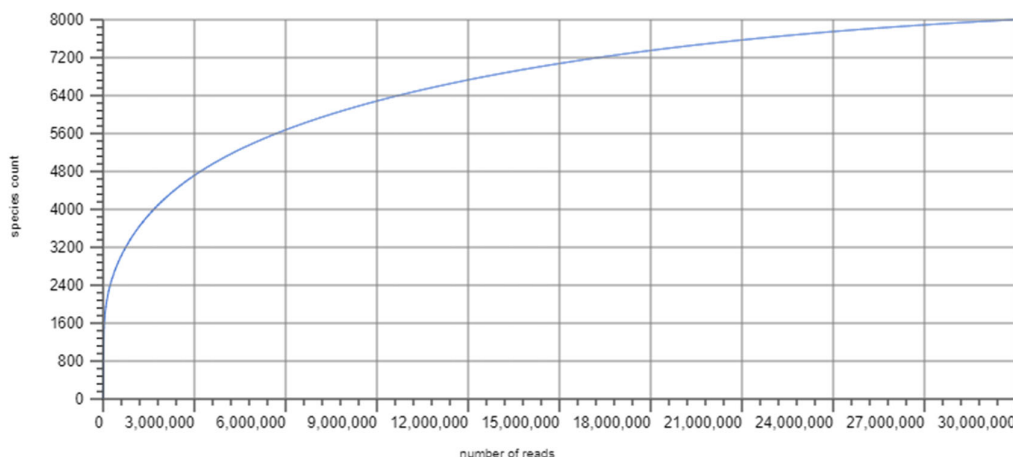

**Supplementary Figure S1.** Rarefaction plot. Assessment of the sequencing depth by plotting species annotation counts against the number of reads analyzed.

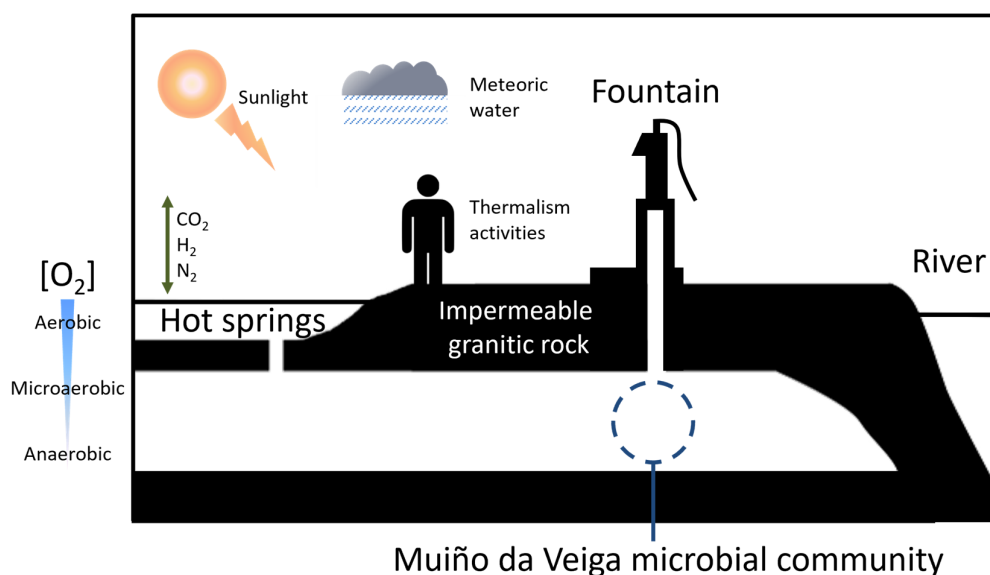

**Supplementary Figure S2.** Schematic representation of Muiño da Veiga hot springs and sampling site. The impermeable granitic rock prevents water with meteoric origins (rain, Miño river) from mixing with the subterranean hot water. Sunlight exposition is limited to the surface of the hot spring's pools, where the exchange of gaseous elements takes place. Oxygen concentration decreases with water depth. As the pools are open for thermalism activities, some degree of cross contamination may take place too.

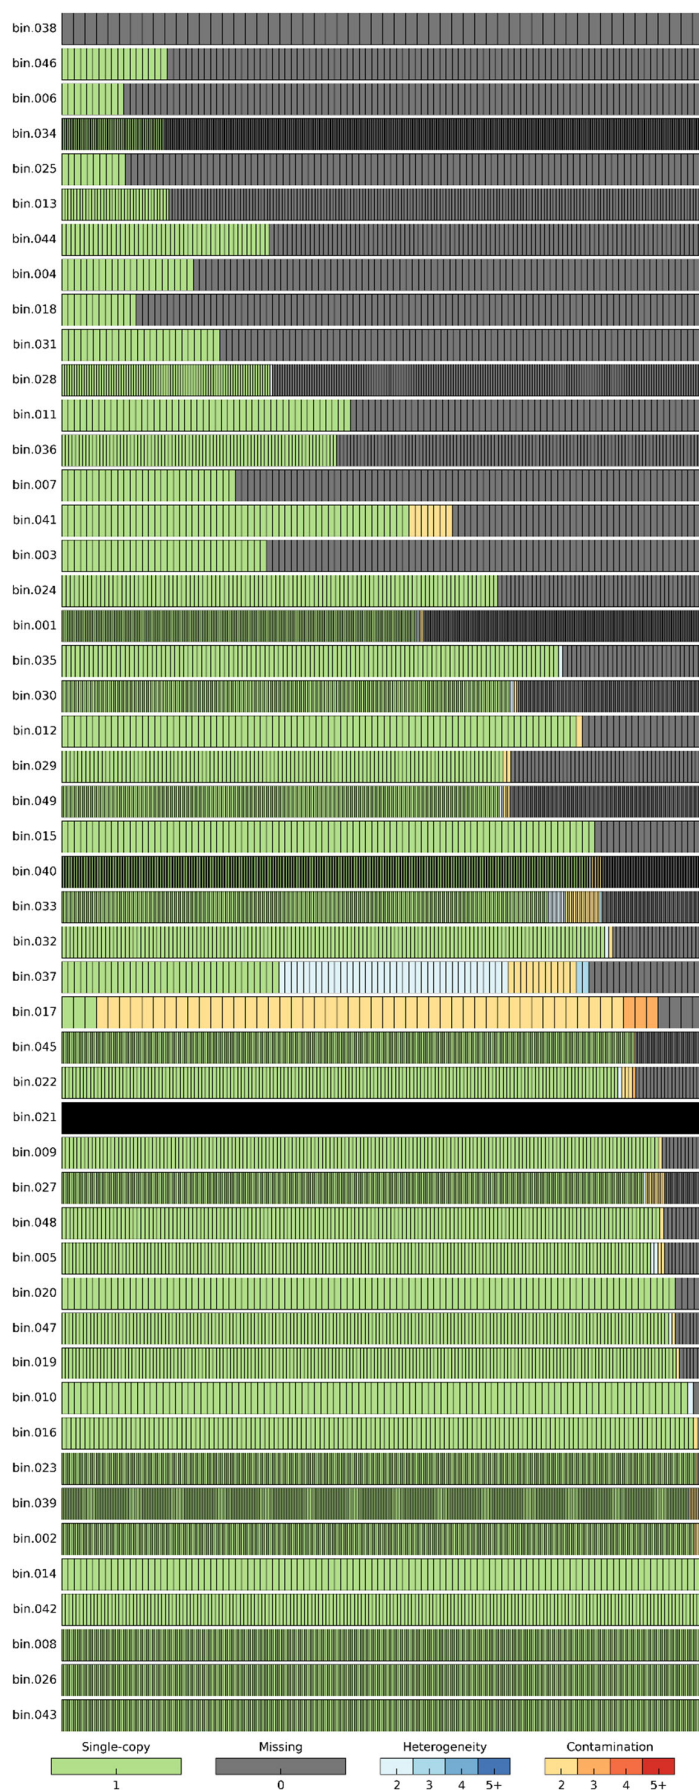

**Supplementary Figure S3.** CheckM plot of the bins obtained from Muiño da Veiga metagenomic read processing. Single copy phylogenetic markers are used to evaluate the bin's completeness and contamination: green color indicates one copy present for the marker gene in the bin; gray indicates an absence; the various shades of orange indicate multiple copies of the marker gene, suggesting a contamination of the bin; various shades of blue indicate multiple copies of the marker gene from closely related strains, suggesting strain heterogeneity in the sample.

**Supplementary Table S1.** Statistics for the metagenome from Muiño da Veiga hot spring.

| FEATURE                                 | NUMBER        | UNITS                   |
|-----------------------------------------|---------------|-------------------------|
| Sequences (uploaded)                    | 27,113,937    | sequences               |
| Basepairs (uploaded)                    | 3,968,584,153 | bp                      |
| Mean sequence length (uploaded)         | 146 ± 24      | bp                      |
| Mean GC content (uploaded)              | 44 ± 13       | %                       |
| QC failed                               | 9,290,572     | Sequences               |
|                                         | 34.265        | % of total              |
| Artificial duplicate reads              | 4,807,111     | Sequences               |
|                                         | 17.729        | % of total              |
| Sequences (post QC)                     | 17,823,365    | Sequences               |
|                                         | 65.735        | % of total              |
| Basepairs (post QC)                     | 2,658,836,275 | bp                      |
|                                         | 66.997        | % of total              |
| Mean sequence length (post QC)          | 149 ± 24      | bp                      |
| Mean GC content (post QC)               | 46 ± 14       | %                       |
| Predicted features                      | 16,639,799    | sequences               |
|                                         | 93.359        | % of total post QC      |
| rRNA genes                              | 72,722        | sequences               |
|                                         | 0.408         | % of total post QC      |
| Predicted protein with known function   | 13,052,391    | sequences               |
|                                         | 73.232        | % of total post QC      |
|                                         | 78.441        | % of predicted features |
| Predicted protein with unknown function | 3,514,686     | sequences               |
|                                         | 19.720        | % of total post QC      |
|                                         | 21.122        | % of predicted features |
| Unknown features                        | 1,183,566     | sequences               |
|                                         | 6.641         | % of total post QC      |

**Supplementary Table S2.** CheckM report for Muiño da Veiga hot spring bins.

| <b>BIN</b> | <b># Genomes</b> | <b># Markers</b> | <b># Marker Sets</b> | <b>0</b> | <b>1</b> | <b>2</b> | <b>3</b> | <b>Completeness</b> | <b>Contamination</b> |
|------------|------------------|------------------|----------------------|----------|----------|----------|----------|---------------------|----------------------|
| 001        | 193              | 427              | 214                  | 188      | 234      | 5        | 0        | 58.19               | 1.67                 |
| 002        | 138              | 335              | 243                  | 5        | 327      | 3        | 0        | 97.94               | 1.23                 |
| 003        | 5449             | 104              | 58                   | 71       | 33       | 0        | 0        | 48.28               | 0.0                  |
| 004        | 5449             | 103              | 57                   | 82       | 21       | 0        | 0        | 18.66               | 0.0                  |
| 005        | 2258             | 181              | 110                  | 12       | 165      | 4        | 0        | 92.67               | 1.82                 |
| 006        | 5449             | 104              | 58                   | 94       | 10       | 0        | 0        | 13.79               | 0.0                  |
| 007        | 5449             | 104              | 58                   | 76       | 28       | 0        | 0        | 41.38               | 0.0                  |
| 008        | 138              | 336              | 246                  | 2        | 333      | 1        | 0        | 99.19               | 0.1                  |
| 009        | 901              | 171              | 117                  | 12       | 158      | 1        | 0        | 91.03               | 0.85                 |
| 010        | 5443             | 102              | 57                   | 2        | 99       | 1        | 0        | 96.49               | 1.75                 |
| 011        | 5443             | 105              | 59                   | 58       | 47       | 0        | 0        | 32.9                | 0.0                  |
| 012        | 5449             | 104              | 58                   | 20       | 83       | 1        | 0        | 68.39               | 1.72                 |
| 013        | 54               | 217              | 168                  | 181      | 36       | 0        | 0        | 17.26               | 0.0                  |
| 014        | 5449             | 104              | 58                   | 1        | 103      | 0        | 0        | 98.28               | 0.0                  |
| 015        | 5449             | 104              | 58                   | 18       | 86       | 0        | 0        | 73.41               | 0.0                  |
| 016        | 2993             | 140              | 85                   | 2        | 137      | 1        | 0        | 97.65               | 1.18                 |
| 017        | 5656             | 56               | 24                   | 4        | 3        | 46       | 3        | 86.11               | 78.7                 |
| 018        | 5449             | 104              | 58                   | 92       | 12       | 0        | 0        | 18.97               | 0.0                  |
| 019        | 2258             | 184              | 114                  | 8        | 175      | 1        | 0        | 95.95               | 0.88                 |
| 020        | 5449             | 104              | 58                   | 5        | 99       | 0        | 0        | 92.95               | 0.0                  |
| 021        | 134              | 1169             | 335                  | 146      | 1012     | 11       | 0        | 87.87               | 0.72                 |
| 022        | 2258             | 180              | 109                  | 20       | 155      | 4        | 1        | 87.36               | 3.26                 |
| 023        | 138              | 338              | 246                  | 6        | 331      | 1        | 0        | 97.76               | 0.2                  |
| 024        | 924              | 151              | 101                  | 49       | 102      | 0        | 0        | 57.72               | 0.0                  |
| 025        | 5449             | 102              | 57                   | 92       | 10       | 0        | 0        | 15.79               | 0.0                  |

|     |      |     |     |     |     |    |   |       |       |
|-----|------|-----|-----|-----|-----|----|---|-------|-------|
| 026 | 138  | 336 | 246 | 2   | 334 | 0  | 0 | 99.19 | 0.0   |
| 027 | 138  | 338 | 246 | 23  | 304 | 11 | 0 | 91.4  | 3.05  |
| 028 | 1495 | 261 | 164 | 176 | 84  | 1  | 0 | 29.19 | 0.61  |
| 029 | 924  | 161 | 108 | 49  | 110 | 2  | 0 | 70.58 | 1.23  |
| 030 | 169  | 313 | 233 | 92  | 217 | 4  | 0 | 68.31 | 1.07  |
| 031 | 5449 | 102 | 57  | 77  | 25  | 0  | 0 | 27.19 | 0.0   |
| 032 | 924  | 163 | 110 | 24  | 137 | 2  | 0 | 83.18 | 1.82  |
| 033 | 169  | 316 | 236 | 52  | 237 | 26 | 1 | 82.51 | 7.55  |
| 034 | 32   | 488 | 209 | 411 | 77  | 0  | 0 | 15.03 | 0.0   |
| 035 | 2993 | 143 | 89  | 32  | 110 | 1  | 0 | 66.56 | 0.1   |
| 036 | 2258 | 188 | 117 | 108 | 80  | 0  | 0 | 35.16 | 0.0   |
| 037 | 5449 | 104 | 58  | 19  | 35  | 48 | 2 | 84.97 | 49.06 |
| 038 | 5656 | 56  | 24  | 56  | 0   | 0  | 0 | 0.0   | 0.0   |
| 039 | 323  | 386 | 233 | 6   | 374 | 6  | 0 | 97.85 | 2.15  |
| 040 | 30   | 540 | 241 | 90  | 439 | 11 | 0 | 80.03 | 1.28  |
| 041 | 5449 | 104 | 58  | 41  | 56  | 7  | 0 | 43.97 | 4.23  |
| 042 | 2258 | 181 | 110 | 1   | 180 | 0  | 0 | 99.09 | 0.0   |
| 043 | 138  | 336 | 246 | 1   | 335 | 0  | 0 | 99.59 | 0.0   |
| 044 | 2993 | 143 | 89  | 97  | 46  | 0  | 0 | 17.59 | 0.0   |
| 045 | 138  | 338 | 246 | 38  | 299 | 1  | 0 | 86.59 | 0.2   |
| 046 | 5449 | 104 | 58  | 87  | 17  | 0  | 0 | 13.17 | 0.0   |
| 047 | 2258 | 181 | 110 | 9   | 170 | 2  | 0 | 93.18 | 1.82  |
| 048 | 924  | 163 | 110 | 11  | 151 | 1  | 0 | 91.82 | 0.91  |
| 049 | 169  | 316 | 236 | 97  | 214 | 5  | 0 | 72.23 | 1.91  |
